# Supplementary material
Source: publisher site journal article supplement (https://www.dovepress.com/article/493298)
Supplement: Supplementary file 1 [file get_supplementary_file.php]

**Table S1. Comparison of ICU, 28-Day, and 60-Day Mortality Between Early and Delayed TMP-SMX Treatment Groups**

|  | Delayed treatment (n=14) | Early treatment  (n=91) | P |
| --- | --- | --- | --- |
| ICU mortality, n (%) | 9 (64.3) | 31 (34.1) | 0.03 |
| 28-day mortality, n (%) | 9 (64.3) | 37 (41.7) | 0.09 |
| 60-day mortality, n (%) | 10 (71.4) | 47 (51.6) | 0.16 |

Note: TMP-SMX, trimethoprim-sulfamethoxazole; Delayed treatment is defined as initiating TMP-SMX therapy ≥96 hours after admission, while early treatment is defined as initiating TMP-SMX therapy <96 hours after admission.

**Table S2. Standard-dose steroid treatment and risk of outcomes after excluding patients with chronic pulmonary disease**

| Exposure | Model 1 a | |  | Model 2 b | |  | Model 3 c | |
| --- | --- | --- | --- | --- | --- | --- | --- | --- |
| HR (95% CI) | *P* |  | HR (95% CI) | *P* |  | HR (95% CI) | *P* |
| 28-day mortality |  |  |  |  |  |  |  |  |
| Standard-dose steroid (n=47) | 0.571(0.302-1.080) | 0.085 |  | 0.048(0.224-1.035) | 0.061 |  | 0.396(0.172-0.911) | 0.029 |
| Low-dose steroid (n=53) | Reference |  |  | Reference |  |  | Reference |  |
| 60-day mortality |  |  |  |  |  |  |  |  |
| Standard-dose steroid (n=47) | 0.543(0.304-0.961) | 0.036 |  | 0.457(0.228-0.917) | 0.028 |  | 0.370(0.171-0.803) | 0.014 |
| Low-dose steroid (n=53) | Reference |  |  | Reference |  |  | Reference |  |

Note: aModel 1 was adjusted for age, BMI, oxygen requirement, immunocompromised status;

bModel 2 was adjusted for the factors in Model 1 and Murry score, APACHEII score, and SOFA score;

cModel 3 was adjusted for the factors in Model 2 and albumin, LDH, PFR, CD4+T cell

Abbreviations: HR, hazard ratio; CI, confidence interval

**Table S3. Standard-dose steroid treatment and risk of outcomes after excluding patients with an interval of more than 14 days**

| Exposure | Model 1 a | |  | Model 2 b | |  | Model 3 c | |
| --- | --- | --- | --- | --- | --- | --- | --- | --- |
| HR (95% CI) | *P* |  | HR (95% CI) | *P* |  | HR (95% CI) | *P* |
| 28-day mortality |  |  |  | 0.445(0.173-1.149) | 0.094 |  |  |  |
| Standard-dose steroid (n=32) | 0.596(0.268-1.326) | 0.205 |  | (-) |  |  | 0.258(0.093-0.711) | 0.009 |
| Low-dose steroid (n=35) | Reference |  |  | Reference |  |  | Reference |  |
| 60-day mortality |  |  |  |  |  |  |  |  |
| Standard-dose steroid (n=32) | 0.607(0.296-1.244) | 0.172 |  | 0.473(0.197-1.135) | 0.094 |  | 0.291(0.117-0.728) | 0.008 |
| Low-dose steroid (n=35) | Reference |  |  | Reference |  |  | Reference |  |

Note: aModel 1 was adjusted for age, BMI, oxygen requirement, immunocompromised status;

bModel 2 was adjusted for the factors in Model 1 and Murry score, APACHEII score, and SOFA score;

cModel 3 was adjusted for the factors in Model 2 and albumin, LDH, PFR, CD4+T cell

Abbreviations: HR, hazard ratio; CI, confidence interval
